# Supplementary material for: El urbanismo de la "Colonia Augusta Firma Astigi": nuevas perspectivas
Source: Royal Society of Chemistry journal article supplement (doi:10.1039/d2dt04014j), 2005-01-01
Supplement: d2dt04014j1.pdf [file d2dt04014j1.pdf]

## Halogen engineering of organic-inorganic hybrid perovskites with nonlinear optical, fluorescence properties and phase transition

Gele Teri, Qiang-Qiang Jia, Hao-Fei Ni, Jun-Qin Wang, Da-Wei Fu\* and Qiang Guo\*  
Institute for Science and Applications of Molecular Ferroelectrics, Key Laboratory of the Ministry of Education for Advanced Catalysis Materials, Zhejiang Normal University, Jinhua, 321004, People's Republic of China.  
E-mail: dawei@seu.edu.cn;qiangguo@zjnu.edu.cn

### Synthetic procedures

#### Synthesis of (4-methoxybenzylammonium)<sub>2</sub>ZnI<sub>4</sub> (1)

All of reagents involved in the experiments were purchased from chemical companies and were used without any further purification. HI, 4-methoxybenzylamine, and zinc bromide were dissolved in methanol to obtain an alcohol solution and the mixed solution was stirred for a few minutes. The target product was got by slow evaporation of the mixed solution at room temperature after several days. Finally, colorless target crystals were obtained.

#### Synthesis of (4-methoxybenzylammonium)<sub>2</sub>ZnBr<sub>4</sub> (2)

On the basis of synthesis 1, zinc iodide was replaced by zinc bromide and finally yellow target crystals were obtained.

### Materials and methods

Dielectric constants were recorded on a Tonghui TH2828A instrument at frequencies of 5 kHz, 10 kHz, 100 kHz, and 1 MHz with a measured AC voltage of 1 V. Differential scanning calorimetry (DSC) was measured on a NETZSCH DSC 3500 instrument by heating and cooling at a rate of 20 K/min under a nitrogen atmosphere. UV-near-infrared-visible (UV-NIR-vis) spectra were obtained on a Cary RF 6000 instrument, and the fluorescence spectra was determined on an FLS 9801 instrument. Powder X-ray diffraction (PXRD) data for two compounds were measured on a D8 Advance 03030502 at room temperature. Diffraction patterns were collected in the  $2\theta$  range of 5~55° with a step size of 0.02°. The CIE coordination was calculated by 1931 CIE package. Crystallographic data of the title compounds was restored by SPEX-III software, and absorption was corrected by multi-scan ( $\omega$ ) method. Furthermore, the crystal structure factors were solved by least squares. Meanwhile, structural factors were refined by SHLXT and OLEX software, and non-hydrogen atoms were refined and positioned by operation of anisotropy. The figures of the title compounds were carried out by DIAMOND package.

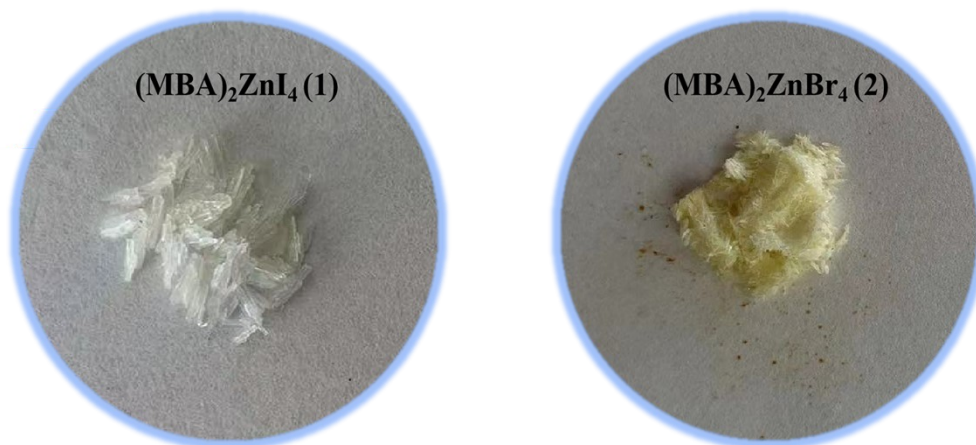

Fig. S1 Single crystals of compounds 1 and 2.

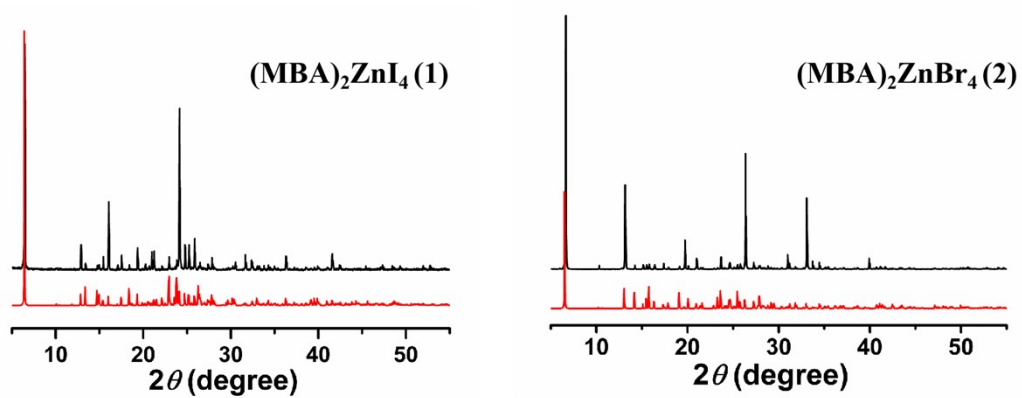

Fig. S2 Powder X-ray diffraction (PXRD) for compounds 1 and 2.

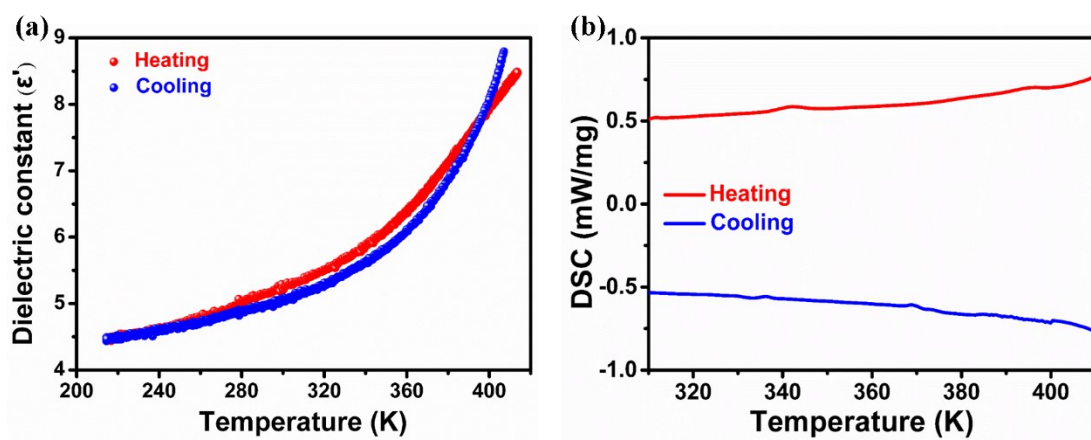

Fig. S3 (a and b) Dielectric and DSC curves of 2.

**Table S1** Crystallographic data and structural refinement details of compound **1**

| Compound                                            | (MBA) <sub>2</sub> ZnI <sub>4</sub>                                             |                                                                                 |
|-----------------------------------------------------|---------------------------------------------------------------------------------|---------------------------------------------------------------------------------|
|                                                     | LTP                                                                             | HTP                                                                             |
| CCDC Code                                           | 2212096                                                                         | 2212097                                                                         |
| Formula                                             | C <sub>16</sub> H <sub>24</sub> I <sub>4</sub> N <sub>2</sub> O <sub>2</sub> Zn | C <sub>16</sub> H <sub>24</sub> I <sub>4</sub> N <sub>2</sub> O <sub>2</sub> Zn |
| Fw                                                  | 849.34                                                                          | 849.34                                                                          |
| Temp(K)                                             | 300                                                                             | 363                                                                             |
| Crystal Syst                                        | Monoclinic                                                                      | Monoclinic                                                                      |
| Space group                                         | <i>P</i> 2 <sub>1</sub> / <i>n</i>                                              | <i>P</i> 2 <sub>1</sub> / <i>c</i>                                              |
| <i>a</i> (Å)                                        | 17.3830(7)                                                                      | 11.330(4)                                                                       |
| <i>b</i> (Å)                                        | 8.2623(4)                                                                       | 8.298(3)                                                                        |
| <i>c</i> (Å)                                        | 18.0124(7)                                                                      | 27.754(9)                                                                       |
| $\alpha$ /°                                         | 90                                                                              | 90                                                                              |
| $\beta$ /°                                          | 102.45(3)                                                                       | 90.45(3)                                                                        |
| $\gamma$ /°                                         | 90                                                                              | 90                                                                              |
| <i>V</i> (Å <sup>3</sup> )                          | 2526.08(19)                                                                     | 2609.2(15)                                                                      |
| <i>Z</i>                                            | 4                                                                               | 4                                                                               |
| $\mu$ (mm <sup>-1</sup> )                           | 5.872                                                                           | 5.685                                                                           |
| GOF on <i>F</i> <sup>2</sup>                        | 1.050                                                                           | 1.074                                                                           |
| <i>R</i> <sub>1</sub> [[ <i>I</i> > 2σ( <i>I</i> )] | 0.0353                                                                          | 0.0447                                                                          |
| <i>wR</i> <sub>2</sub> (all data)                   | 0.0615                                                                          | 0.0999                                                                          |

**Table S2** Crystallographic data and structural refinement details of compound **2**

| Compound                                            | (MBA) <sub>2</sub> ZnBr <sub>4</sub>                                             |
|-----------------------------------------------------|----------------------------------------------------------------------------------|
| CCDC Code                                           | 2212095                                                                          |
| Formula                                             | C <sub>16</sub> H <sub>24</sub> Br <sub>4</sub> N <sub>2</sub> O <sub>2</sub> Zn |
| Fw                                                  | 661.38                                                                           |
| Temp(K)                                             | 273                                                                              |
| Crystal Syst                                        | Monoclinic                                                                       |
| Space group                                         | <i>P</i> 2 <sub>1</sub>                                                          |
| <i>a</i> (Å)                                        | 10.871(4)                                                                        |
| <i>b</i> (Å)                                        | 7.644(3)                                                                         |
| <i>c</i> (Å)                                        | 13.574(5)                                                                        |
| $\alpha$ /°                                         | 90                                                                               |
| $\beta$ /°                                          | 92.486(9)                                                                        |
| $\gamma$ /°                                         | 90                                                                               |
| <i>V</i> (Å <sup>3</sup> )                          | 1126.9(7)                                                                        |
| <i>Z</i>                                            | 2                                                                                |
| $\mu$ (mm <sup>-1</sup> )                           | 8.193                                                                            |
| GOF on <i>F</i> <sup>2</sup>                        | 0.993                                                                            |
| <i>R</i> <sub>1</sub> [[ <i>I</i> > 2σ( <i>I</i> )] | 0.0423                                                                           |
| <i>wR</i> <sub>2</sub> (all data)                   | 0.0800                                                                           |

**Table S3** Selected bond lengths /Å and angles/° for compound **1**

| Compound <b>1</b> |           |  |           |            |  |
|-------------------|-----------|--|-----------|------------|--|
| LTP               |           |  | HTP       |            |  |
| I1-Zn1            | 2.6081(7) |  | I1-Zn1    | 2.6059(13) |  |
| I3-Zn1            | 2.6120(7) |  | I2-Zn1    | 2.6314(12) |  |
| I2-Zn1            | 2.6078(7) |  | I3-Zn1    | 2.6152(15) |  |
| I4-Zn1            | 2.6233(7) |  | I4-Zn1    | 2.6255(15) |  |
| O1-C5             | 1.365(6)  |  | N1B-C1B   | 1.465(15)  |  |
| O1-C8             | 1.423(7)  |  | O2-C5     | 1.373(12)  |  |
| N2-C16            | 1.473(7)  |  | O2-C9     | 1.447(15)  |  |
| O2-C15            | 1.366(7)  |  | C11-C16   | 1.384(12)  |  |
| O2-C9             | 1.421(8)  |  | C11-C12   | 1.351(14)  |  |
| C5-C6             | 1.381(7)  |  | C11-C10B  | 1.490(14)  |  |
| C5-C4             | 1.366(7)  |  | C2-C7     | 1.376(12)  |  |
| C2-C7             | 1.371(8)  |  | C2-C1A    | 1.513(13)  |  |
| C2-C3             | 1.377(8)  |  | N2B-C10B  | 1.455(14)  |  |
| C2-C1             | 1.496(8)  |  | O3-C17    | 1.364(13)  |  |
| C12-C16           | 1.513(8)  |  | O3-C14    | 1.400(13)  |  |
| C12-C11           | 1.380(8)  |  | C2-C3     | 1.387(12)  |  |
| C12-C13           | 1.373(7)  |  | C16-C15   | 1.349(12)  |  |
| C6-C7             | 1.381(7)  |  | C7-C6     | 1.375(13)  |  |
| N1-C1             | 1.456(8)  |  | C5-C6     | 1.356(13)  |  |
| C4-C3             | 1.390(8)  |  | C5-C4     | 1.391(14)  |  |
| C11-C10           | 1.390(8)  |  | C5-O1     | 1.406(14)  |  |
| C13-C14           | 1.363(8)  |  | C14-C15   | 1.332(13)  |  |
| C10-C15           | 1.362(8)  |  | C14-C13   | 1.376(14)  |  |
| C15-C14           | 1.378(8)  |  | C14-O3    | 1.400(17)  |  |
| I1-Zn1-I3         | 108.58(3) |  | C4-C3     | 1.367(13)  |  |
| I1-Zn1-I4         | 108.93(3) |  | C13-C12   | 1.407(14)  |  |
| I3-Zn1-I4         | 109.06(3) |  | N2A-C10A  | 1.482(14)  |  |
| I2-Zn1-I1         | 109.38(2) |  | O3-C17    | 1.364(13)  |  |
| I2-Zn1-I3         | 108.23(2) |  | I1-Zn1-I2 | 108.11(5)  |  |
| I2-Zn1-I4         | 112.58(3) |  | I1-Zn1-I4 | 109.89(4)  |  |
|                   |           |  | I3-Zn1-I1 | 110.00(4)  |  |
|                   |           |  | I3-Zn1-I2 | 107.34(4)  |  |
|                   |           |  | I3-Zn1-I4 | 112.77(4)  |  |
|                   |           |  | I4-Zn1-I2 | 108.59(4)  |  |

**Table S4** Selected bond lengths /Å and angles/° for compound **2**

| Compound <b>2</b> |            |             |           |
|-------------------|------------|-------------|-----------|
| Br1-Zn1           | 2.4085(17) | O2-C10      | 1.368(12) |
| Br2-Zn1           | 2.4020(17) | N2-C16      | 1.465(13) |
| Br3-Zn1           | 2.4086(17) | C10-C11     | 1.400(14) |
| Br4-Zn1           | 2.4052(16) | C10-C15     | 1.366(14) |
| O1-C5             | 1.378(11)  | C11-C12     | 1.380(15) |
| O1-C8             | 1.423(14)  | C12-C13     | 1.382(15) |
| N1-C1             | 1.407(14)  | C13-C14     | 1.400(14) |
| C1-C2             | 1.501(14)  | C13-C16     | 1.517(13) |
| C2-C3             | 1.372(14)  | C14-C15     | 1.399(14) |
| C2-C7             | 1.383(14)  | Br1-Zn1-Br3 | 109.27(6) |
| C3-C4             | 1.375(14)  | Br2-Zn1-Br1 | 111.08(6) |
| C4-C5             | 1.381(14)  | Br2-Zn1-Br3 | 110.30(5) |
| C5-C6             | 1.379(14)  | Br2-Zn1-Br4 | 107.28(6) |
| C6-C7             | 1.388(13)  | Br4-Zn1-Br1 | 110.71(6) |
| O2-C9             | 1.424(12)  | Br4-Zn1-Br3 | 108.13(6) |
